# Supplementary material for: Variant spectrum of PIEZO1 and KCNN4 in Japanese patients with dehydrated hereditary stomatocytosis
Source: PubMed Central journal article supplement (PMC9981561; doi:10.1038/s41439-023-00235-y), 2023-03-02
Supplement: 41439_2023_235_MOESM1_ESM.pdf [file 41439_2023_235_MOESM1_ESM.pdf]

## Supplemental Figure S1. Image of the electropherogram of Sanger sequencing

**Patient 1: p.A427 L428insGMDQSYVCA**

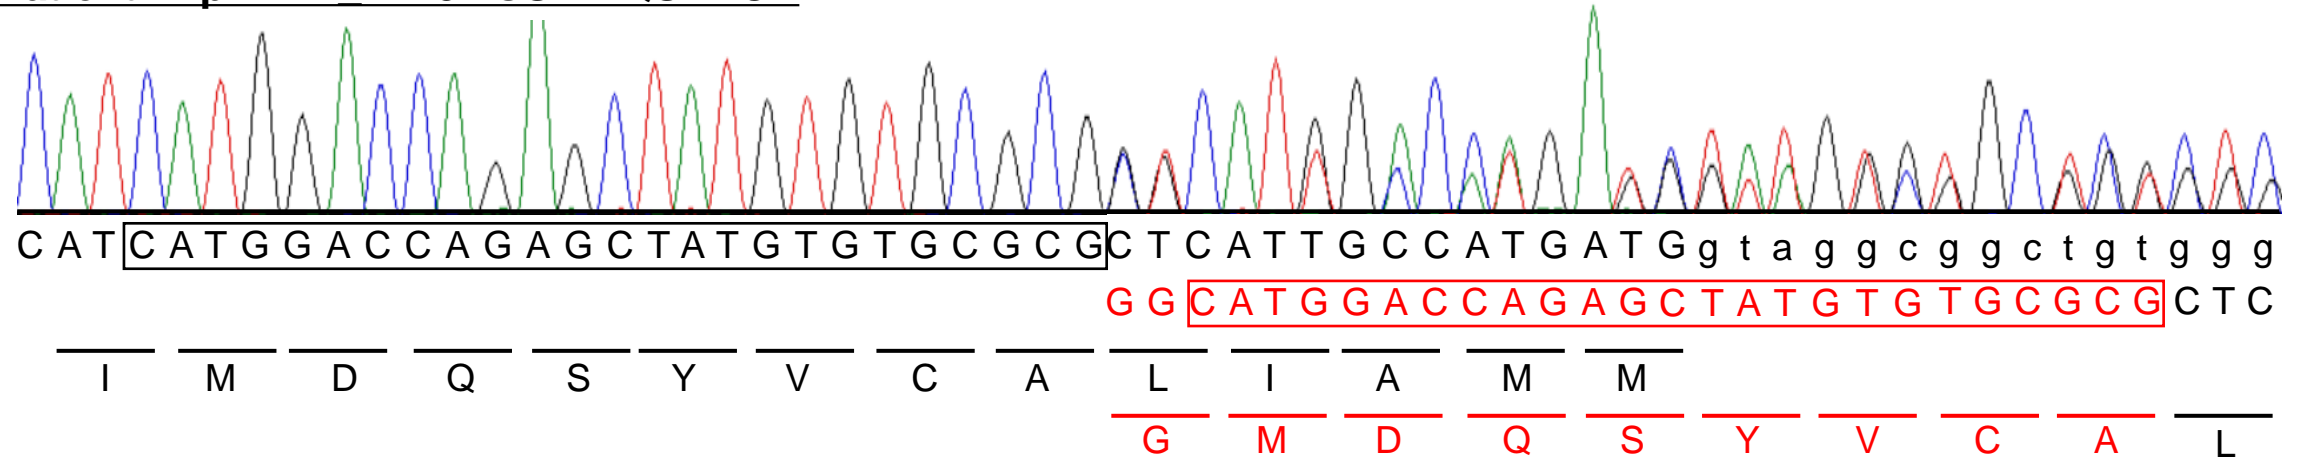

Red characters indicate the 27-bp insertion, which is consisted with the 25-bp duplication in addition with GG. Black and red rectangles indicate the original and duplicated 25-bp nucleotide segments, respectively. By adding “GG”, the inserted 25-bp nucleotide segment caused 9 amino-acid insertion reading to in-frame insertion.
