# Supplementary material for: Variant spectrum of PIEZO1 and KCNN4 in Japanese patients with dehydrated hereditary stomatocytosis
Source: PubMed Central journal article supplement (PMC9981561; doi:10.1038/s41439-023-00235-y), 2023-03-02

**Supplemental Figure S2. Images of the electropherograms of Sanger sequencing**

**Patient 2: p.V598M**

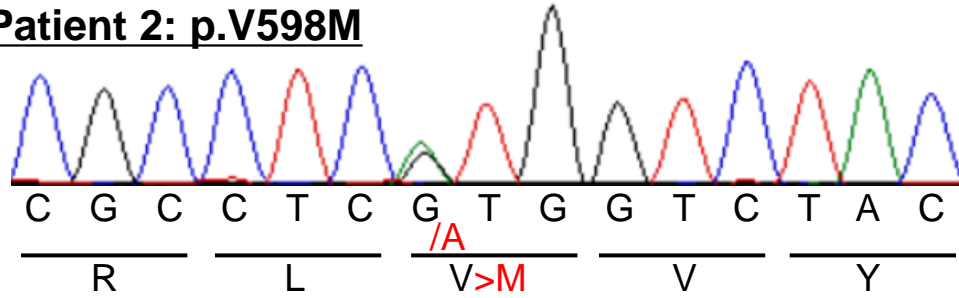

**Patient 3: p.A1457V**

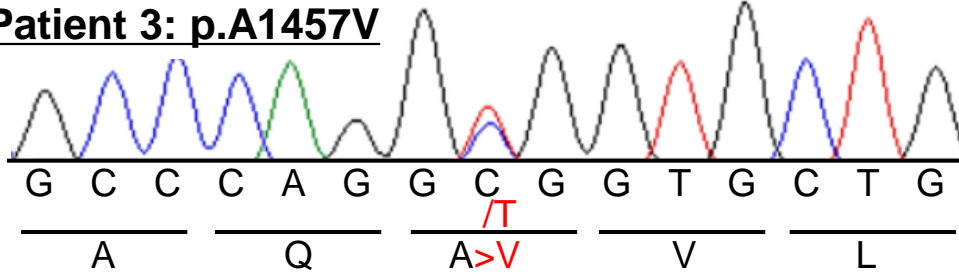

**Patient 4: p.T2014I**

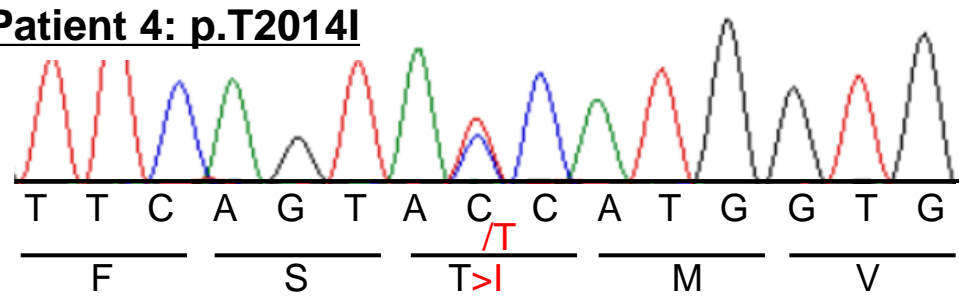

**Patient 5: p.K2323T**

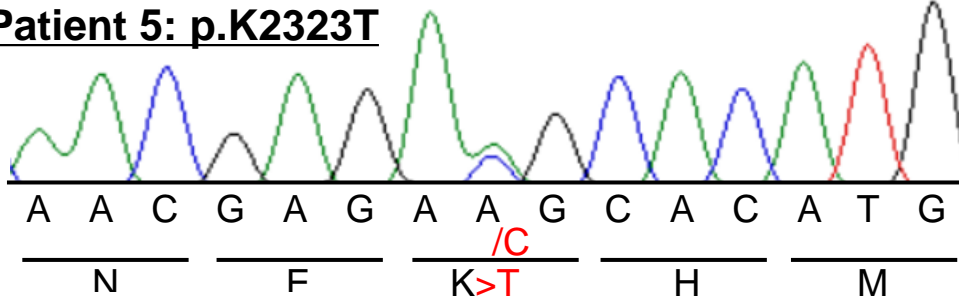

**Patient 6: p.R2488Q**

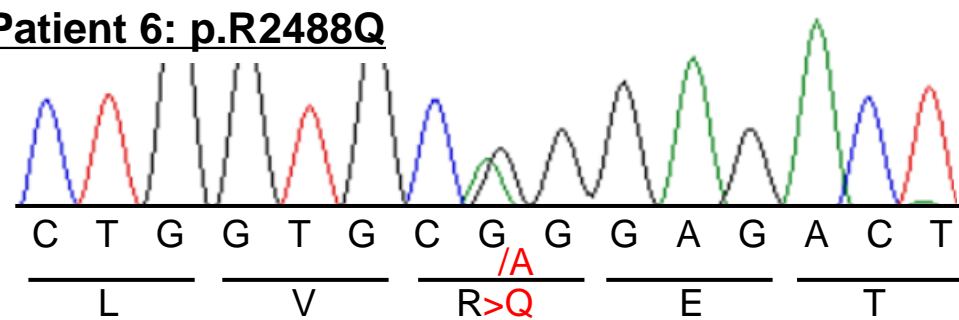

**Patient 7: p.L2495 E2496dup**

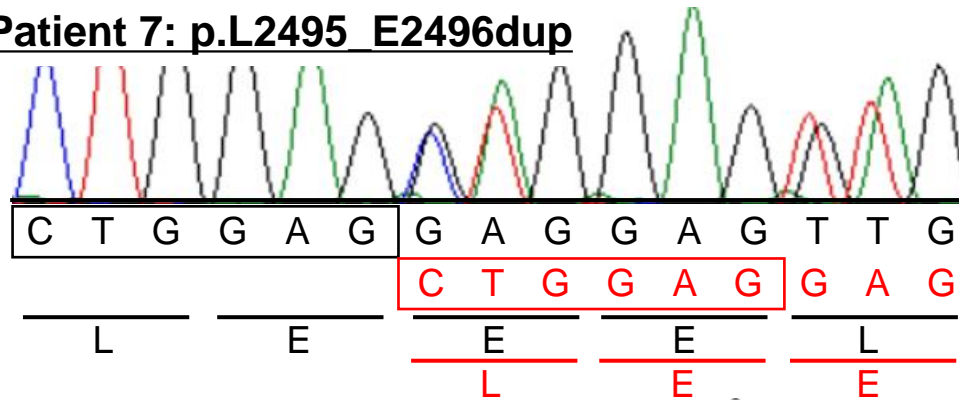

**Patient 11: p.A279T**

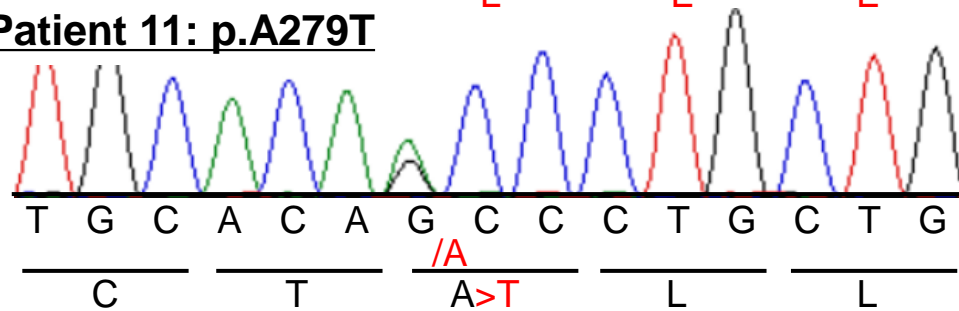

**Patient 12: p.R352H**

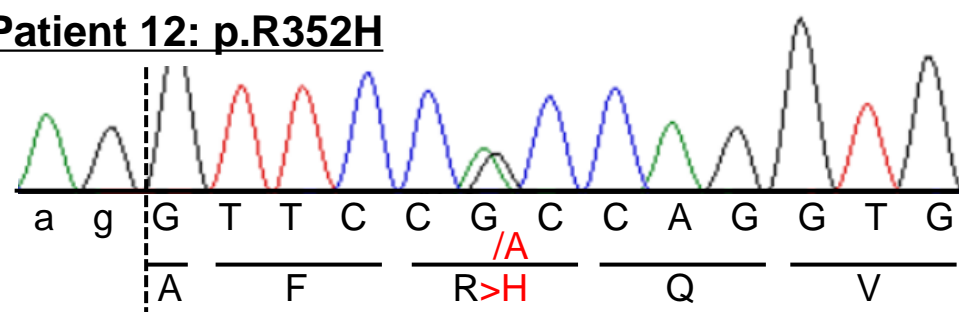

Supplement: 41439_2023_235_MOESM2_ESM.pdf [file 41439_2023_235_MOESM2_ESM.pdf]
